# Supplementary material
Source: PubMed Central journal article supplement (PMC2859993)
Supplement: NIHMS173001-supplement-01.pdf [file NIHMS173001-supplement-01.pdf]

## Supplementary Table 1

| Marker         | Primer | Sequence 5'-3'                     |
|----------------|--------|------------------------------------|
| <i>KRAS</i>    | F      | AAC TTG TGG TAG TTG GAG C          |
|                | R      | AAA GAA TGG TCC TGC ACC AG         |
| <i>BRAF</i>    | F      | CCT TTA CTT ACT ACA CCT C          |
|                | R      | GCC TCA ATT CTT ACC ATC C          |
| <i>SOCS1</i>   | F      | GTG GGT ATT TTT TTG GTG            |
|                | R      | ACT ACC ATC CAA ATA AAA AC         |
| <i>RUNX3</i>   | F      | GGG TAG TAY GGA GTA GAG GAA GTT GG |
|                | R      | ACC TCC CTC CCC RAC CTT CC         |
| <i>MLH1</i>    | F      | GGT ATT TTT GTT TTT ATT GGT T      |
|                | R      | ACT CTA TAA ATT ACT AAA TCT CTT    |
| <i>CACNAG1</i> | F      | GAA GGA TAT GGG TTA TAG AT         |
|                | R      | CTA CTT AAA CCA AAA CAA CC         |
| <i>NEUROG1</i> | F      | TGT AGT TYG GAT TGA GGG TAG AG     |
|                | R      | CCC CTA CAC CCT TCC AAA            |
| <i>LINE-1</i>  | F      | TTT TGA GTT AGG TGT GGG ATA TA     |
|                | R      | AAA ATC AAA AAA TTC CCT TTC        |

### Pyrosequencing primers

|                |                                 |
|----------------|---------------------------------|
| <i>SOCS1</i>   | TGG GTA TTT TTT TGG TG          |
| <i>RUNX3</i>   | GTG GTT AGT TAG TAA GTT TAT TAT |
| <i>MLH1</i>    | AAA AAA GAA TTA ATA GGA A       |
| <i>CACNAG1</i> | GAA GGA TAT GGG TTA TAG AT      |
| <i>NEUROG1</i> | TAG TTA GGA TTG AGG GTA GA      |
| <i>LINE-1</i>  | AGTTAGGTGTGGGATATAGT            |

| CIMP marker    | Location of amplicon in relation to exon-1            |
|----------------|-------------------------------------------------------|
| <i>SOCS1</i>   | +291-420                                              |
| <i>RUNX3</i>   | +83-283                                               |
| <i>MLH1</i>    | - 339-173                                             |
| <i>CACNAG1</i> | 47825-47893 (based upon GenBank Accession # AC021491) |
| <i>NEUROG1</i> | -158-49                                               |
| <i>LINE-1</i>  | +210-356                                              |
