# Supplementary material
Source: PubMed Central journal article supplement (PMC2859993)
Supplement: NIHMS173001-supplement-02.pdf [file NIHMS173001-supplement-02.pdf]

**Supplementary Table 2**

|    | <b>CACNAG1</b> | <b>MLH1</b> | <b>NEUROG1</b> | <b>RUNX3</b> | <b>SOCS1</b> | <b>LINE1</b> |
|----|----------------|-------------|----------------|--------------|--------------|--------------|
| 1  | 17,6           | 4,2         | 29             | 13           | 2,3          | 59,3         |
| 2  | 8,0            | 1,6         | 8,5            | 2,9          | 1,8          | 61,3         |
| 3  | 3,8            | 3,0         | 29,5           | 3            | 20,2         | 53,8         |
| 4  | 5,1            | 1,4         | 13,1           | 6,5          | 3,0          | 63,5         |
| 5  | 3              | 2,3         | 24,1           | 1            | 5,3          | 68,9         |
| 6  | 16,4           | 0,6         | 28,7           | 6            | 3,2          | 72,9         |
| 7  | 16,4           | 2,1         | 24             | 1,7          | 2,8          | 66,9         |
| 8  | 3,0            | 5,4         | 32,8           | 3,7          | 4,0          | 64,7         |
| 9  | 2,7            | 7,0         | 25,6           | 12,4         | 3,8          | 53,8         |
| 10 | 2,1            | 1,2         | 7,6            | 4,0          | 5,4          | 48,4         |
| 11 | 5,7            | 3,7         | 27             | 7            | 3            | 58,4         |
| 12 | 2,2            | 2,7         | 4,4            | 3            | 4,1          |              |
| 13 | 3,2            | 1,6         | 5,3            | 2,6          | 2,4          | 55,3         |
| 14 | 6,1            | 1,7         | 8              | 3            | 7,0          | 68,4         |
| 15 | 1,9            | 2,9         | 32,4           | 3,9          | 5,3          | 51,5         |
| 16 | 3,0            | 4,5         | 18,9           | 3,7          | 5,1          | 69,8         |
| 17 | 2,0            | 1,5         | 35             | 3            | 1,6          | 36,3         |
| 18 | 8              | 0,9         | 33,6           | 7            | 3            | 53,6         |
| 19 | 2,9            | 5,9         | 55,3           | 3,8          | 5,6          | 62,3         |
| 20 | 10,4           | 3           | 7,5            | 10           | 2,6          | 75,1         |
| 21 | 3,2            | 1,2         | 7,3            | 2,4          | 19,8         | 57,9         |
| 22 | 3,2            | 2,9         | 6,9            | 3,7          | 2,6          | 59,5         |
